# Supplementary material for: Comparative Study of the Role of Interepithelial Mucosal Mast Cells in the Context of Intestinal Adenoma-Carcinoma Progression
Source: MDPI journal article supplement (doi:10.3390/cancers14092248), 2022-04-30
Supplement: s1 [file s1]

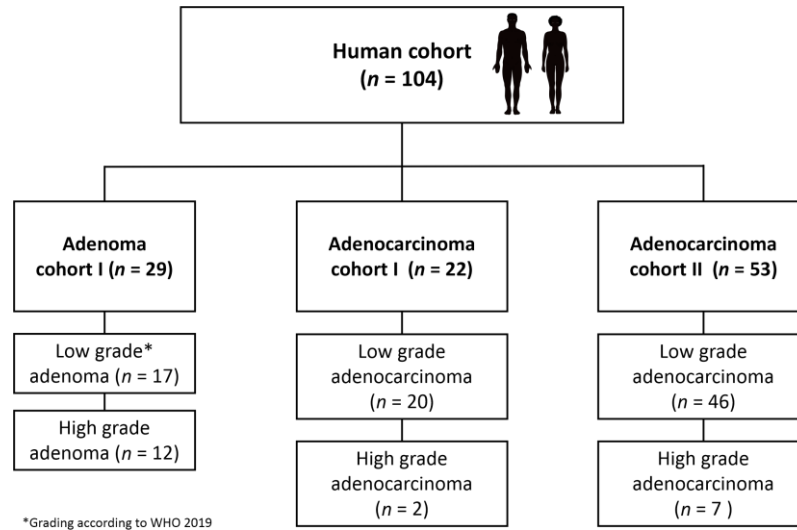

**Figure S1.** Overview of the human cohort ( $n = 104$ ). Cohort I of  $n = 17$  low-grade and  $n = 12$  high-grade adenomas and  $n = 22$  adenocarcinomas was extended by adenocarcinoma cohort II ( $n = 53$ ). Grading of adenomas and carcinomas (low-grade; high-grade) was accomplished according to the current human WHO classification [46].

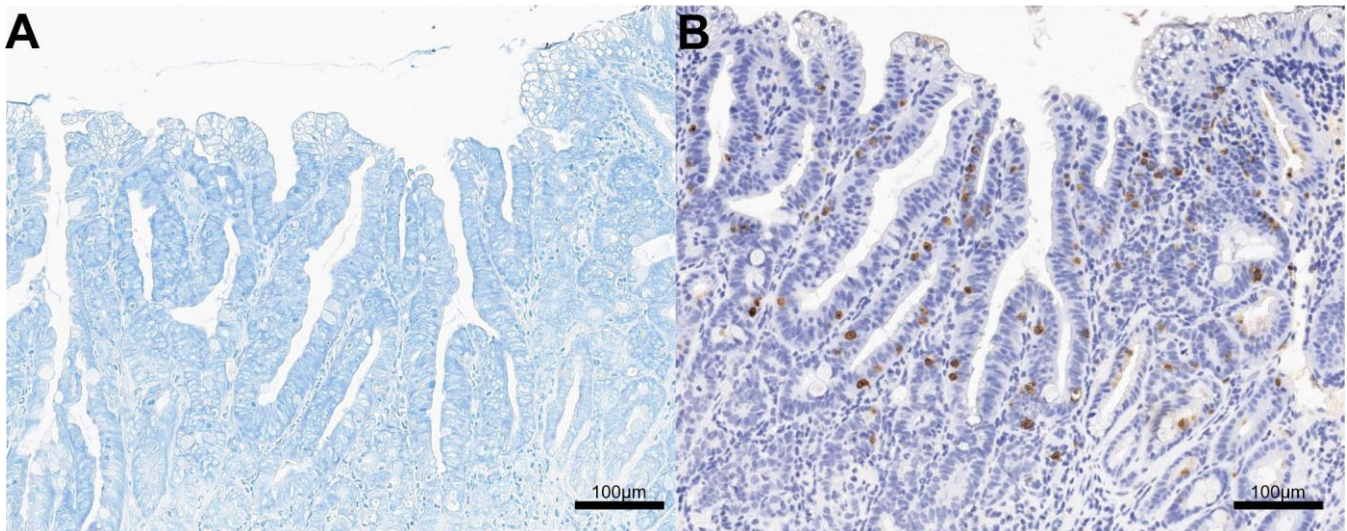

**Figure S2.** A,B: Interepithelial mucosal mast cells (ieMMCs) in the intestinal mucosa of mice were not identifiable by metachromatic staining (toluidine blue). Serial sections for toluidine blue (A) and MCPT1 (B).



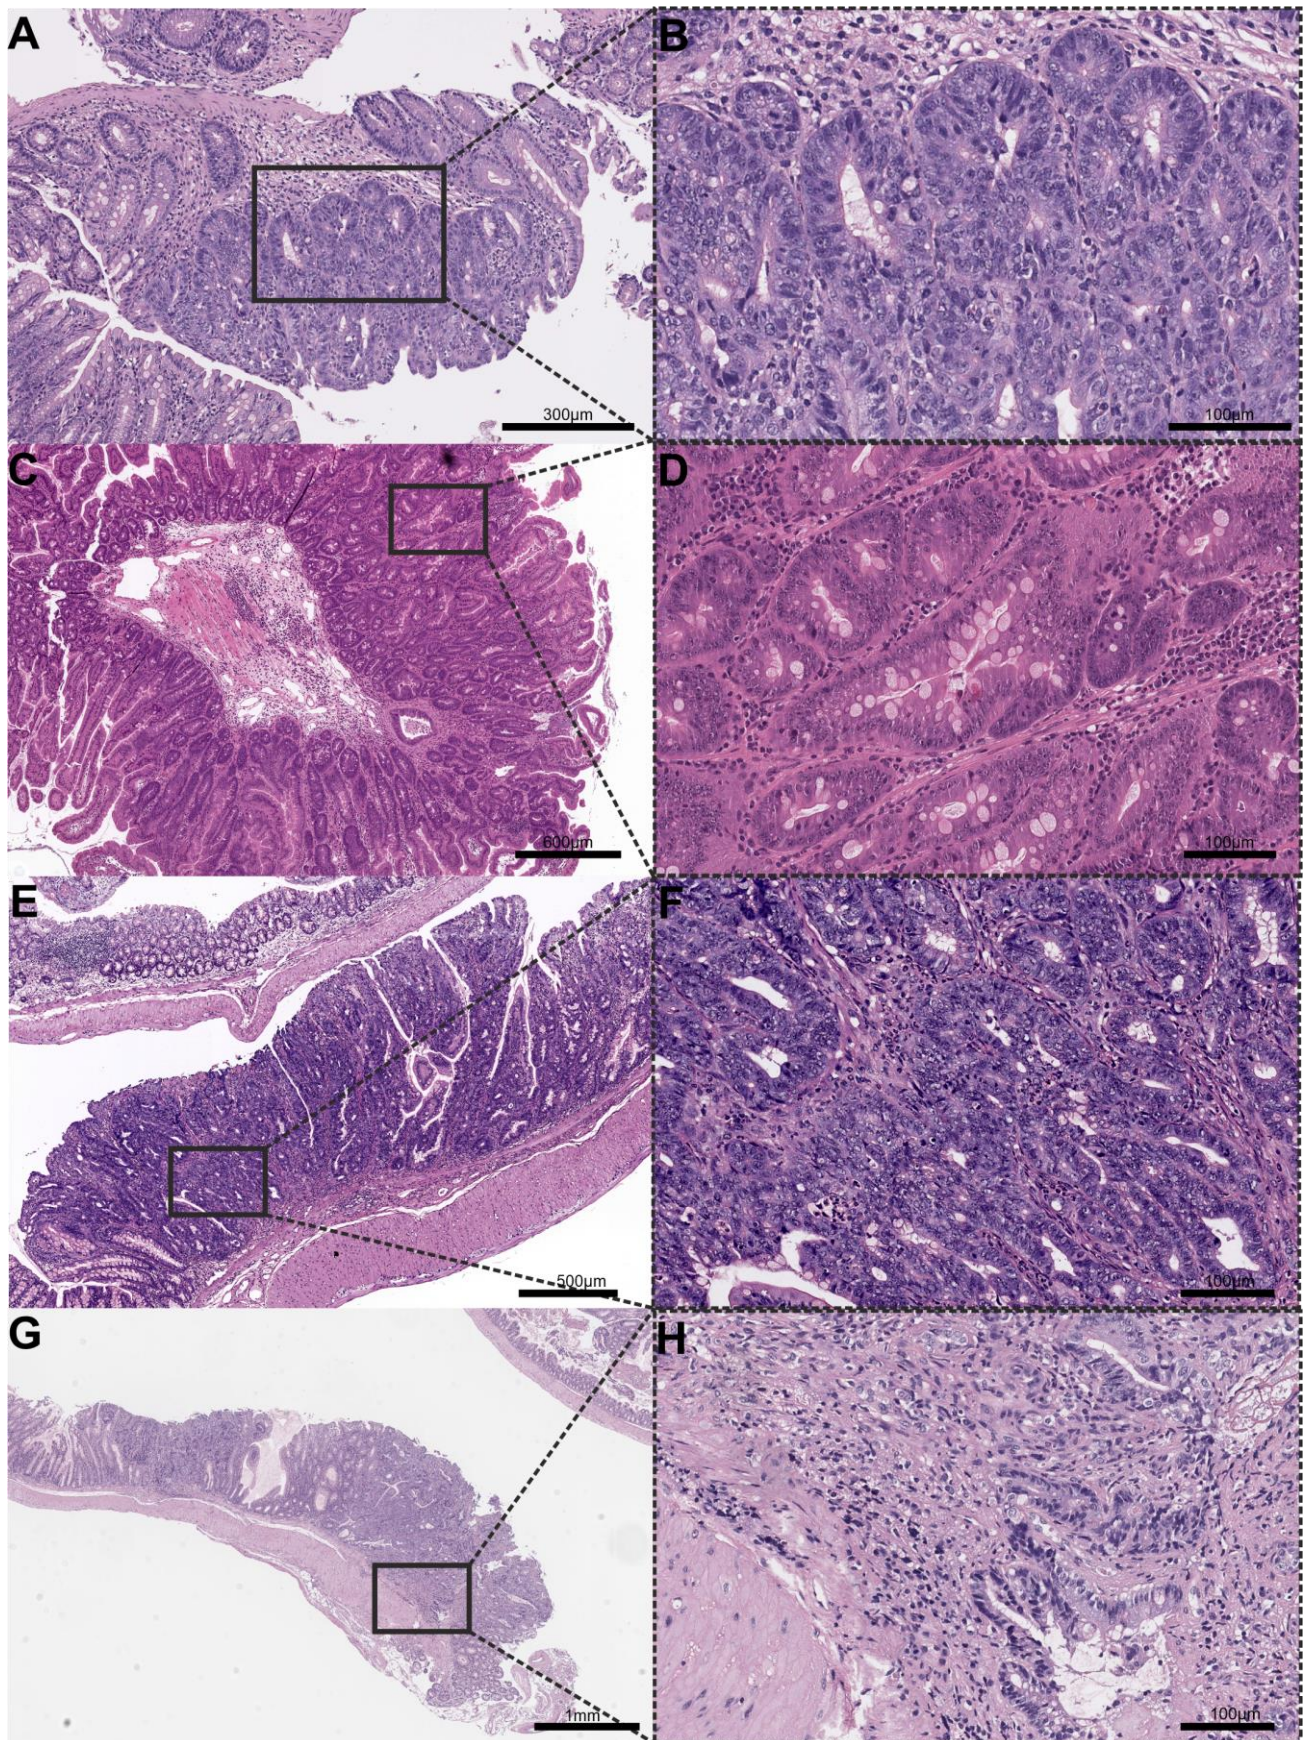

**Figure S3.** Grading of murine lesions was performed according to Nolte et al., 2016 (Table S4) [45]. A–H: Murine lesions were graded as atypical hyperplasia (A,B); low-grade adenoma (C,D); high-grade adenoma (E,F); or invasive carcinoma (G,H).



| 0                                                                                | 1                                                                                 | 2                                                                                 | 3                                                                                  | 4                                                                                   | 5                                                                                   |
|----------------------------------------------------------------------------------|-----------------------------------------------------------------------------------|-----------------------------------------------------------------------------------|------------------------------------------------------------------------------------|-------------------------------------------------------------------------------------|-------------------------------------------------------------------------------------|
| No positive mast cells (MCs) in the neoplastic area                              | Single positive MCs ( $\leq 5/\text{hpf}$ ) in the neoplastic area                | Few diffuse positive MCs ( $\leq 10/\text{hpf}$ ) in the neoplastic area          | Some diffuse positive MCs ( $\leq 20/\text{hpf}$ ) in the neoplastic area          | Many diffuse, possibly clustered positive MCs ( $\leq 30/\text{hpf}$ )              | Many positive, significantly clustered MCs ( $> 30/\text{hpf}$ )                    |
| 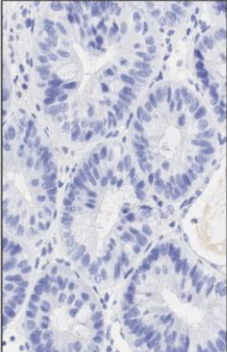 |  |  |  |  |  |

**Figure S4:** The employed semiquantitative score (0 to 5) for mucosal mast cells (ieMMC and IpMMC) in hotspots of murine intestinal lesions. Corresponding to Table 1 (hpf: high-power field, 40 $\times$ ).



## Mouse

## Human

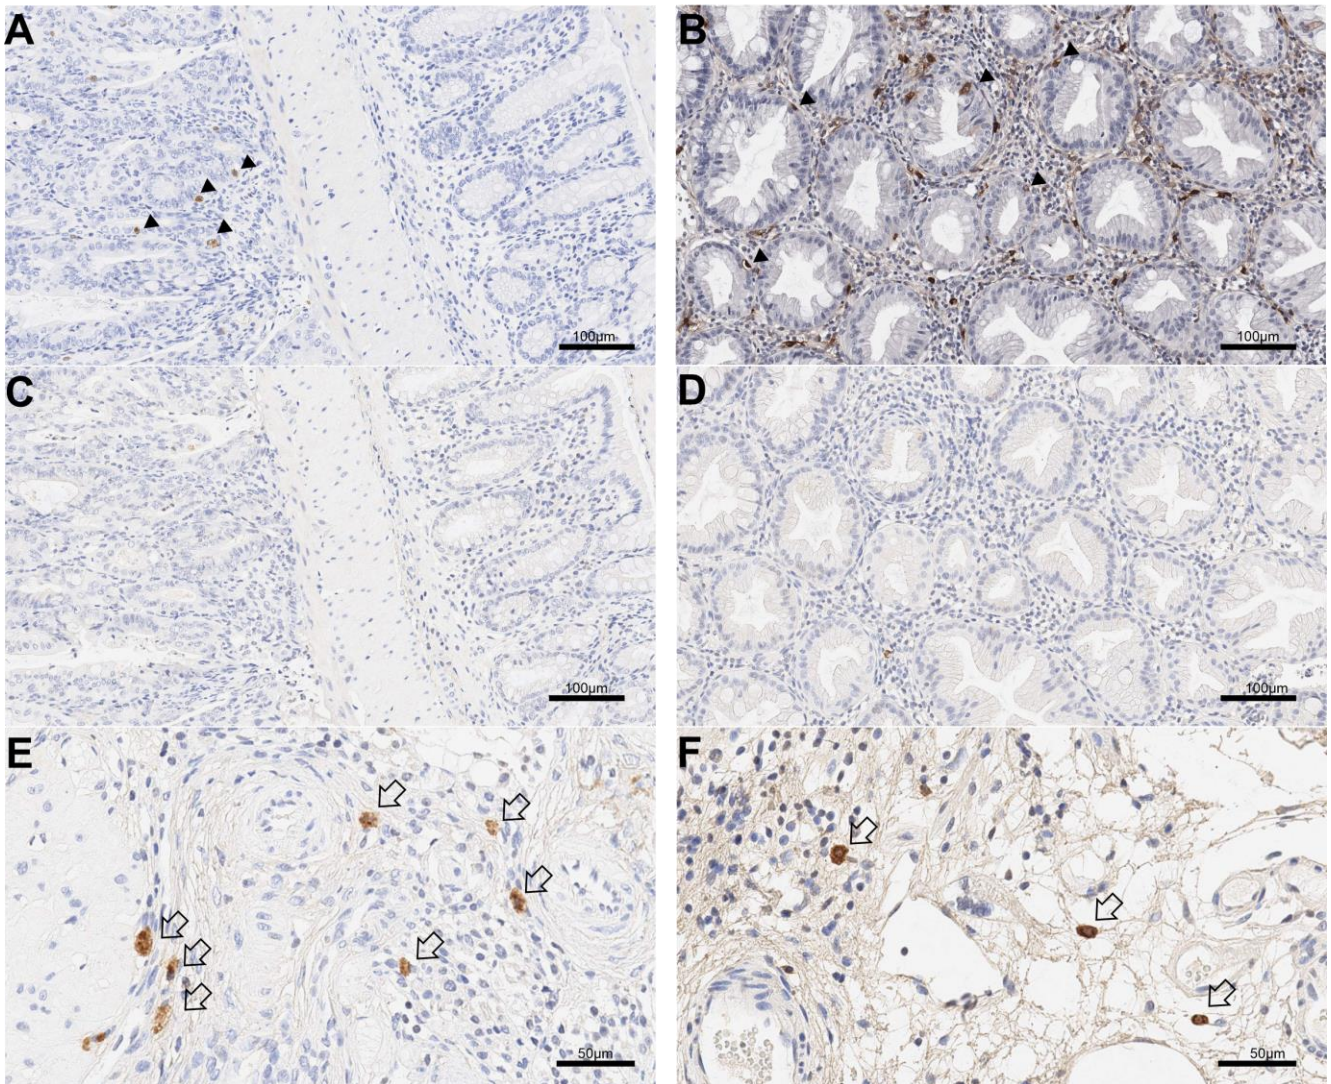

**Figure S5:** A–F: ieMMCs (A,B) were negative for histamine (C,D), while connective tissue mast cells (CTMCs) of the intestine were positive for histamine (E,F). A,C: Murine high-grade adenoma with MPCT1<sup>+</sup> ieMMCs (arrowheads) (A), which were negative for histamine in the serial section (C). B,D: Human low-grade sessile serrated adenoma with MCT<sup>+</sup> ieMMCs (arrowheads) (B), which were negative for histamine in the serial section (D). E,F: CTMCs in the intestine of mice (E) and humans (F) were positive for histamine (arrows).

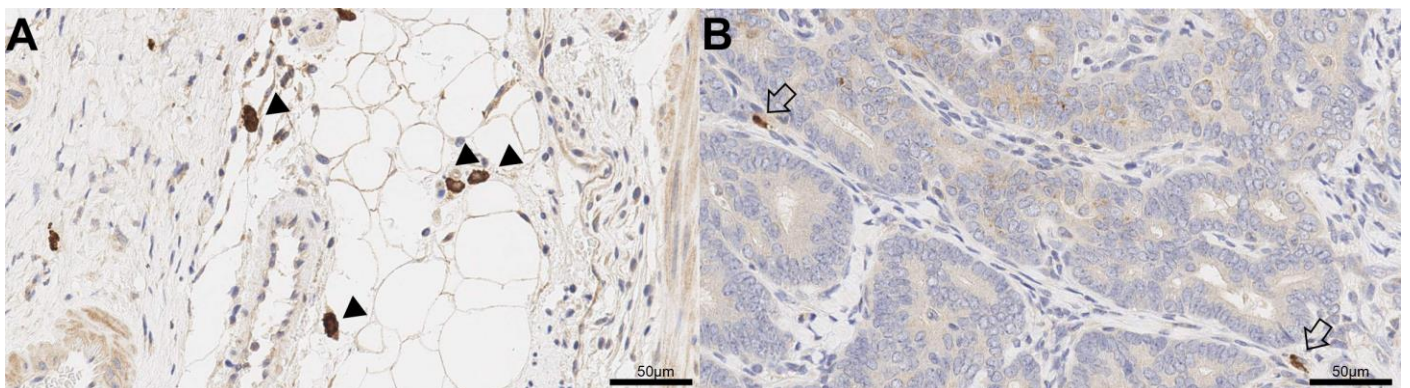

**Figure S6:** A: Murine connective tissue mast cells (CTMCs) were MCPT6<sup>+</sup> (MC Tryptase<sup>+</sup>) and appeared densely granulated and round (arrowheads). B: Lamina propria mucosal mast cells (lpMMCs, MCPT6<sup>+</sup>) of mice were generally slender and smaller than CTMCs (arrows).



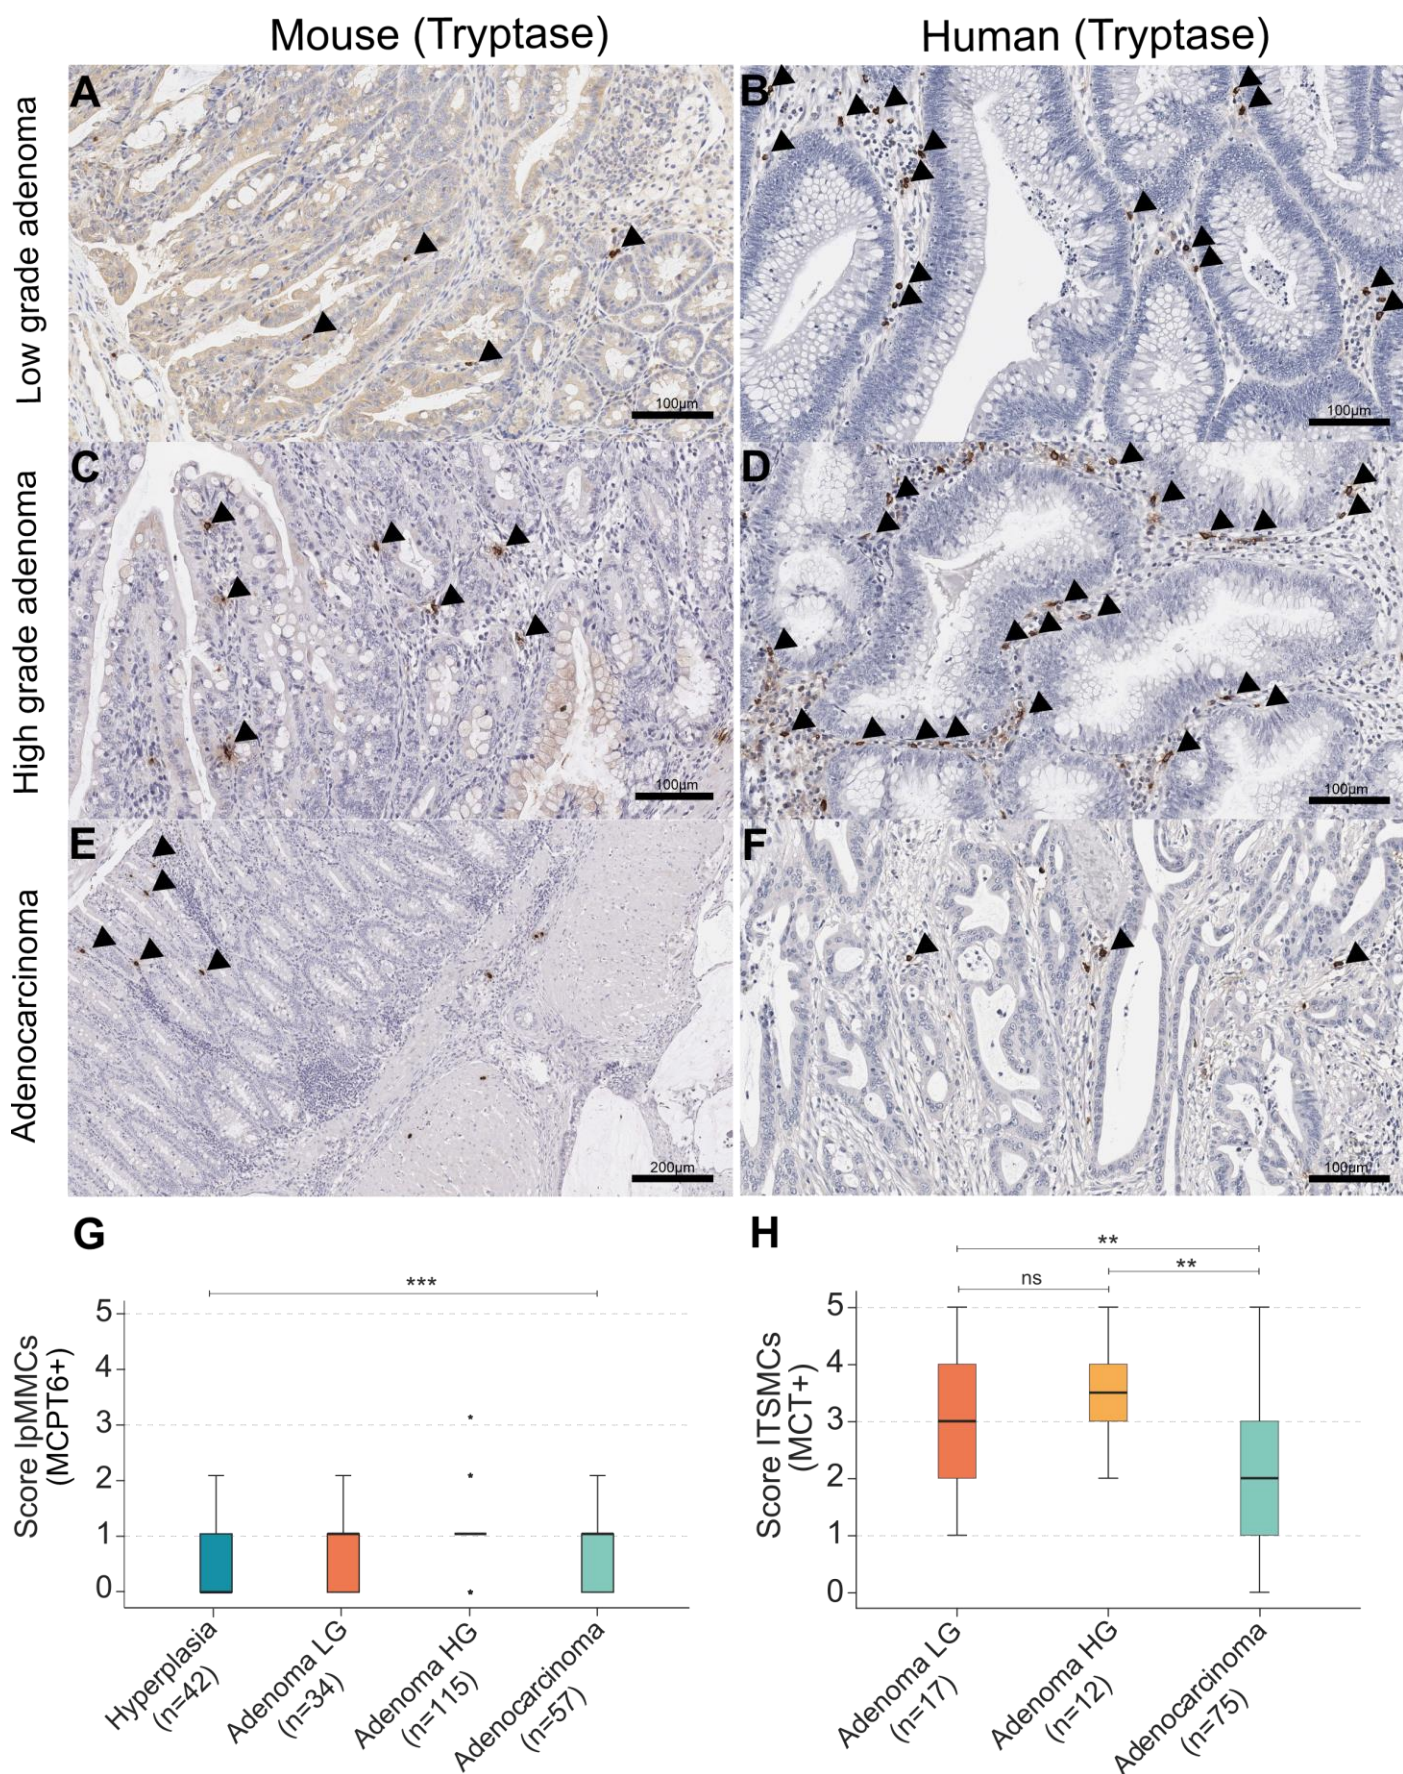

**Figure S7:** A–F: LpMMCs in the adenoma-carcinoma sequence of mouse (A,C,E) and intratumoral stromal MCs (ITSMCs) in the human adenoma-carcinoma sequence (B,D,F). G: Scores of LpMMCs were lower in murine hyperplastic precursor lesions than in adenomas and carcinomas (Kruskal–Wallis test,  $p = 0.001$ ). H: Contradictorily, stromal MC scores were higher in human precursor lesions than in carcinomas (Kruskal–Wallis test,  $p < 0.001$ ).



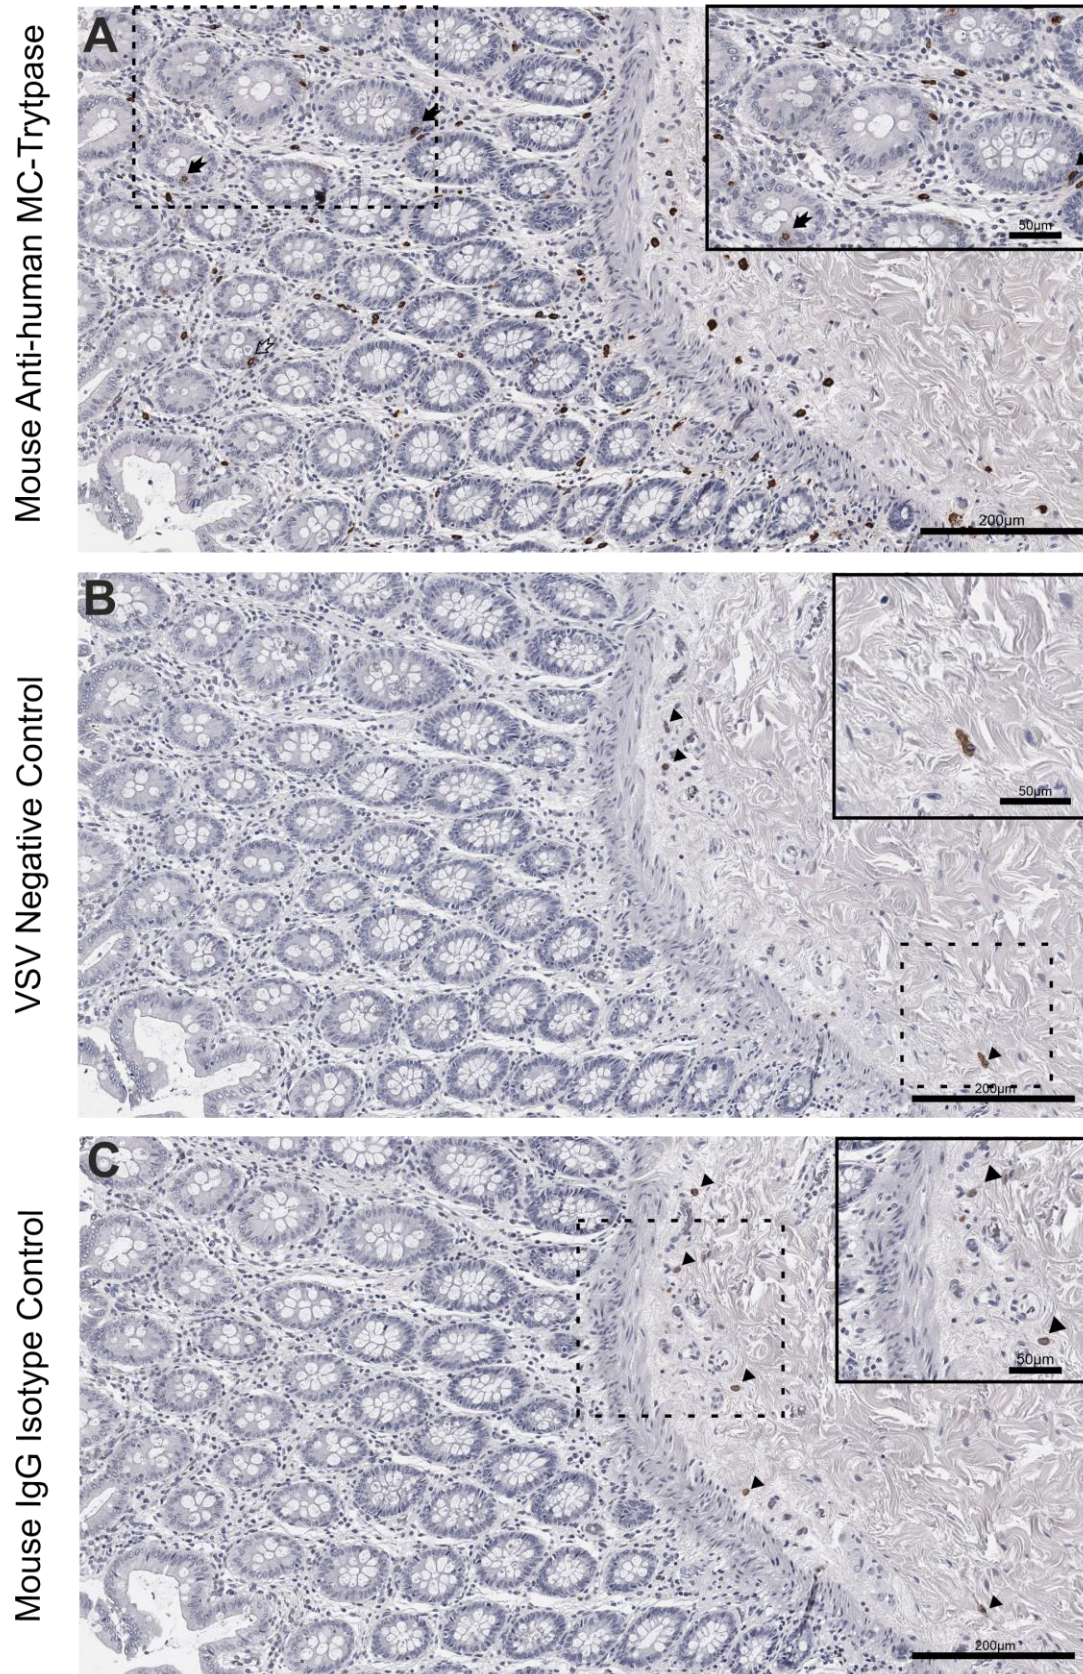

**Figure S8:** A–C: Individual human intratumoral stromal mast cells (ITSMCs) appeared to be nonspecifically positive due to heparin presence as previously described [52]. A,B: MC tryptase-positive (MCT<sup>+</sup>) ieMMCs (A) (arrows) were negative in vesicular stomatitis virus (VSV) IHC (B) and in mouse isotype IgG control (C), serving as negative IHC controls. B,C: Connective tissue mast cells (CTMCs) were occasionally positive in negative controls. Thus, MCT IHC (A) was a specific marker for human intestinal ieMMCs.



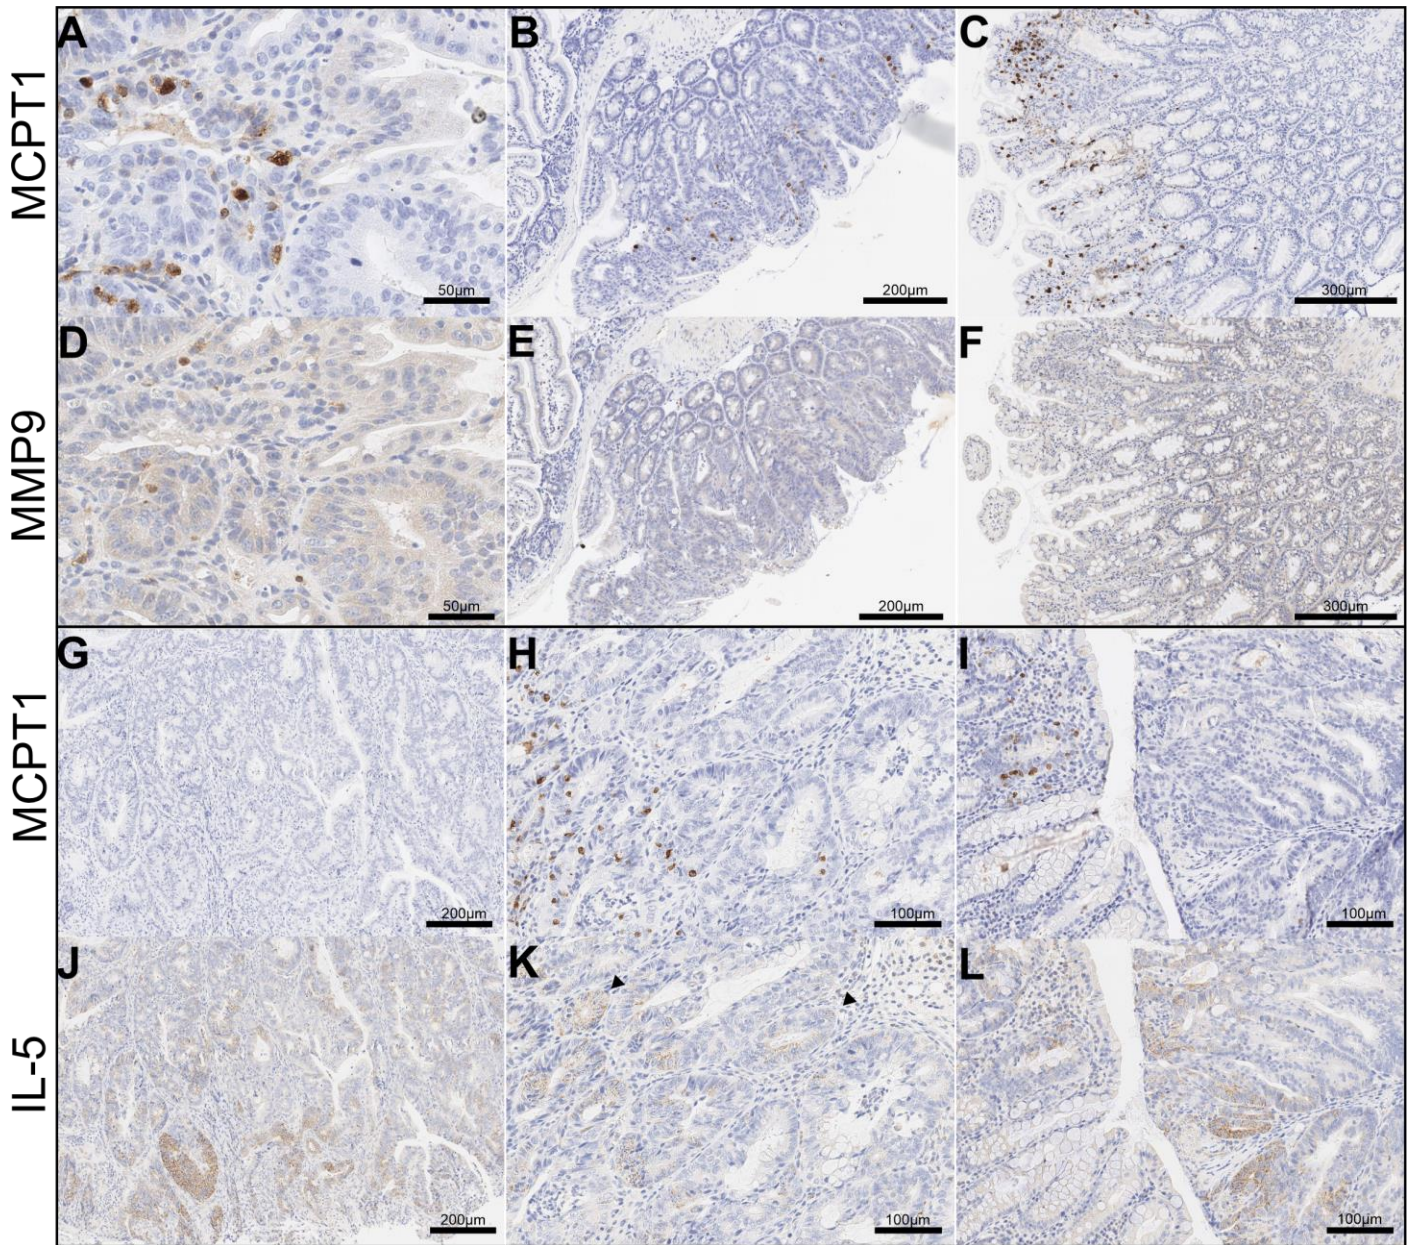

**Figure S9:** A–F: MCPT1<sup>+</sup> ieMMCs (A–C) were not coincident with MMP9<sup>+</sup> cells (D–F) in serial sections. G–L: Absence (G) or presence of MCPT1<sup>+</sup> ieMMCs in murine intestinal neoplasia. J–L: Luminal intestinal crypt cells were more often positive for IL-5 than basal crypt cells (J–L), but IL-5 positivity did not clearly correlate with ieMMC density (arrow-heads).
